# Supplementary material
Source: PubMed Central journal article supplement (PMC4115535)
Supplement: 1402695111_pnas.201402695SI.pdf [file 1402695111_pnas.201402695SI.pdf]

# Supporting Information

Karthigeyan et al. 10.1073/pnas.1402695111

## 1. SI Results and Discussion

**1.1. Comparison of Inhibitory Activity of Felodipine with Commercially Available Inhibitors.** Kinase assays were performed (autoradiogram in Fig. S3A) in the presence of either DMSO (Sigma) (Fig. S3A, lane 3)/felodipine 10  $\mu$ M and 20  $\mu$ M (Fig. S3A, lanes 4 and 5) or MLN8237 0.1  $\mu$ M and 1  $\mu$ M (Fig. S3A, lanes 1 and 2). This is in agreement with the published results for MLN8237 (1). Both felodipine and MLN8237 can inhibit Aurora A but cannot affect the kinase activity of Aurora B (autoradiogram in Fig. S3B). The Aurora A kinase activity is dependent on the autophosphorylation at Thr-288 in its activation loop (2).

**1.2. In Vitro Kinase Assay.** Felodipine may also inhibit the autophosphorylation of Aurora A in a dose-dependent manner, in vitro, which is comparable to its substrate (histone H3) phosphorylation inhibition (in the autoradiogram in Fig. S3C, compare lane 2 with lanes 3–8). The  $IC_{50}$  of felodipine was  $\sim$ 20  $\mu$ M in the kinase assay using the inhibition of Aurora A autophosphorylation (Fig. S3D). Collectively, these results suggest that felodipine selectively inhibits Aurora A but not B in vitro. Felodipine was tested against a selective panel of kinases, as listed in Table S1 at a concentration of 20  $\mu$ M. Among the tested kinases, felodipine inhibits only LCK kinase and VEGF-R2 kinase comparable to Aurora A kinase at this concentration, whereas the rest of the kinases are not significantly affected. To test the effects of these small molecules on Aurora A inside the cell, we treated HeLa cells preexposed to nocodazole (mitotic phase synchronization) for 12 h before incubation with felodipine (20  $\mu$ M) and with 20  $\mu$ M MG132 for 3 h in the presence of nocodazole before harvesting the cells. Western blot analysis was performed using the anti-pThr-288 Aurora A antibody as a biomarker (degree of autophosphorylation) for Aurora A activity and anti-GAPDH for the loading control (Fig. S4A). The results showed significant inhibition of Aurora A autophosphorylation only in the cells treated with felodipine (Fig. S4A, lane 2) compared with cells treated with DMSO only (Fig. S4A, lane 1).

**1.3. Kinase Assay in a Cellular System.** To investigate the effect of felodipine in a cellular system, the mitotic phosphorylation was analyzed by a Western blot analysis using anti-MPM2 antibody to compare the DMSO with felodipine/MLN8237-treated HeLa cells (Fig. S4B). A similar analysis of a specific substrate of Aurora A other than autophosphorylation was performed. HeLa cells were treated with DMSO or 20  $\mu$ M felodipine (Fig. S4C) and Western blot analysis performed using the anti-ph-TACC3 and  $\alpha$ -tubulin antibody as the loading control, which also showed inhibition of phosphorylation [in Fig. S4C, compare lanes 2 and 3 in the ph-TACC3 (Ser-558) gel]. In a parallel assay the ph-TACC3 level was scored using the immunostained HeLa cells preexposed to nocodazole based on the fluorescence intensity over the centrosomal body of dividing cells ( $n = 100$ ). As shown in Fig. S4D, after treatment with an increasing concentration of felodipine, the number of cells positive for this staining decreased. Moreover, the number of cells with low and medium intensity was relatively higher compared with the number of centrosomes that showed high-intensity fluorescence. Similarly, asynchronous HeLa cells were treated with either 20  $\mu$ M felodipine for various time points (Fig. S4E) or treated for 24 h using the indicated concentrations of felodipine (Fig. S4F). Western blot analysis was performed using antibodies recognizing pSer 10 on histone H3 (ph-H3) using the cell lysates. The anti-histone

H3 antibody was used as the loading control. In the time-course assay an initial increase in the ph-H3 levels was noticed by 1 h posttreatment. However, a subsequent reduction in the marker was observed up to 24 h posttreatment. Similarly, a dose-dependent reduction in the ph-H3 was observed in the cell lysates treated with 20 and 40  $\mu$ M felodipine (in Fig. S4B, compare lanes 2 and 3 with lane 1 in the  $\alpha$ -tubulin gel) compared with cells treated with DMSO (Fig. S4B, lane 3). The cellular  $IC_{50}$  for Aurora A and B was determined using the ph-T288 and ph-H3S10 mark, respectively (Fig. S4G). These data suggest that felodipine also inhibits the Aurora A activity in the cellular system.

**1.4. Molecular Docking and Molecular Dynamics Simulation of the Secondary Sites of Binding.** Understanding that felodipine binds to the surface pocket surrounded by the residues Phe-157, Ile-158, and Tyr-212, we decided to test the binding within similar surface pockets that exist on human Aurora A. The molecular docking by Autodock (3) showed the majority of the population docked to either the previously mentioned hinge pocket or the pocket over the N-terminal domain surrounded by the residues Trp-128 and His-201. The docked pose is shown in Fig. S7A. This pocket also differs from human Aurora B due to the side chain variations between the two kinases (Fig. S7B). The molecular dynamics (MD) simulation shows the stability of felodipine in this pocket over a time period of 2 ns (Fig. S7C). We also decided to investigate another hydrophobic site, which is formed by the combination of Try-334 and Tyr-338. However, the MD simulation shows that felodipine is not stable over this pocket (Fig. S7D).

**1.5. Inhibition Kinetics of Felodipine.** Because felodipine is not an ATP analog and the findings from our in silico and in vitro studies were suggestive of an uncompetitive mechanism of inhibition, we assessed the kinetic behavior of felodipine-mediated inhibition of Aurora A kinase. Based on the kinetic parameters represented in Fig. S8B, we concluded that felodipine inhibits Aurora A in a mixed fashion. Further the isothermal calorimetric titration revealed that felodipine has a stoichiometry of  $n = 2$  binding sites (Fig. S8C).

**1.6. Felodipine Induces Spindle Pole Defects and Cell Death and Further Retards Tumor Progression.** The effects of felodipine on the cell cycle were explored by FACS analysis using five different cell lines: HeLa, HEK293T, MCF7, HCT116, and C6 cells. The results showed that felodipine may induce a dose-dependent increase in aneuploidy compared with DMSO control. In the case of HeLa cells, the 2–4 and  $>4$  N population of cells increased after treatment with felodipine compared with the cells treated with DMSO which had a 2 and 4 N DNA content. In HEK293T cells after treatment with felodipine, the 2N population decreased significantly, whereas the 2–4, 4, and  $>4$  N population increased with an increasing concentration of felodipine compared with the cells treated with DMSO. Similarly, the 2–4 and  $>4$  N populations in MCF7 and HCT116 both showed a dramatic increase in felodipine-treated cells compared with the DMSO-treated cells (Fig. S9A). To further confirm the cell cycle stage in which felodipine treatment shows arrest, we performed a G2/M block using HEK293T cells and then subsequently released the cells after 12 h of treatment with 100 ng/mL nocodazole in the presence of either DMSO or 20  $\mu$ M felodipine or 100 ng/mL nocodazole (Fig. S9B). At the end of the 24 h, the cells were fixed in ethanol and stained with propidium iodide to analyze their DNA content to assign the percentage of cells that

reside across the different stages of cell cycles. The results tabulated from the FACS analysis showed that 37% of the cells treated with felodipine remained in the G2/M stage, similar to the nocodazole-treated cells of which nearly 58% cells were arrested in the G2/M stage; whereas only 27% of the whole population was present in the DMSO-treated cells (Fig. S9C). These data suggest that felodipine acts at the G2-to-M transition level where Aurora A is expected to exhibit peak activity during the cell cycle.

The spindle pole morphology in HeLa cells, after felodipine treatment by immunocytochemistry analysis, was investigated using the anti- $\alpha$ -tubulin antibody. Confocal microscopic images obtained from the cells treated with 10  $\mu$ M felodipine were compared with DMSO-treated cells only. Cells with DMSO treatment showed classical bipolar spindle assembly in dividing cells but defects such as monopolar and multipolar spindle were observed in felodipine-treated cells as shown in 40 $\times$  magnification in Fig. S10B. To obtain a better visualization, coimmunofluorescence images were captured at 100 $\times$  magnification using anti- $\alpha$ -tubulin and anti-Aurora A antibodies (Fig. S10 C and D). The relationship between felodipine treatment and the onset of spindle defects was unambiguously established through the manual quantification of these defects (both monopolar as well as multipolar spindles), using the same images obtained from the previous experiment. Approximately 40% of the dividing cells exhibited defective spindle morphology compared with DMSO-treated cells (Fig. S10E). The results obtained from the cellular system encouraged us to investigate the effect of felodipine over the tumor progression rate. Thus, we s.c. administered felodipine on a daily basis to the nude mice that were xenografted with C6 glioma cells. The tumor progression rate and the corresponding immunohistochemical (IHC) analysis of the p-H3S10 marker in the sections obtained from the corresponding tumor tissue are shown in Fig. S10 F and G, respectively. The statistical analysis performed with the IHC images (Fig. S10H) showed that felodipine can also block the cellular proliferation in vivo.

**1.7. Advantages and Limitations of Surface-Enhanced Raman Spectroscopy.** Surface-enhanced Raman spectroscopy (SERS) is a form of Raman spectroscopy which is dependent on the high electromagnetic field in the vicinity of the metallic surface with nanoscale roughness to achieve a high Raman cross-section (4). It produces routine enhancements on the order of more than  $10^4$ – $10^6$  with a maximum enhancement as high as  $10^{12}$  (5). This high enhancement in SERS signals can lead to ultra-low detection of analyte molecules and even down to single-molecule detection (5). The very important point of SERS, especially in the case of therapeutically important proteins, is that it can be performed in a physiological environment and in the active state of the protein. This makes it possible to analyze protein–ligand interactions at significantly lower concentrations compared with NMR and X-ray crystallography. This, combined with the knowledge of the structure of the protein and MD simulation, becomes a potential tool for drug discovery. A thorough understanding of SERS activity in proteins by isotopic substitution to understand the origin of these modes can provide a credible platform for routine use of SERS. Numerous groups have demonstrated that Raman spectroscopy provides information about the secondary and tertiary structure of the protein and the relative abundance of the different amino acids present in protein (6). However, in the case of SERS, it is not always possible to assess all of the vibrational modes of a protein, with the exception of the regions close to the nanoparticle surface (7). The limited information obtained from SERS may be necessary and sufficient to derive important information about the protein without a complete Raman mode analysis. The most prominent modes observed in SERS consist of the amide modes (I, II, and III), which are combination modes of C=O and N–H bonds, are

sensitive to hydrogen bonding, and consequently provide information about the secondary structures of proteins. Surface selection rules serve an important role in SERS (8) because different modes of the amino acid residues Phe, Tyr, Trp, and His can be present or absent in the spectrum, depending on their orientation with respect to the nanoparticle surface. This surface-sensitive information can be effectively used for deducing any small molecule binding to the protein which generates two probable scenarios. First, the bound ligand may shift certain residues away from the nanoparticle surface thus obscuring these modes. A few modes of the ligand may be observed in the spectra instead. Second, the bound ligand may completely change the orientation of the protein with respect to the nanoparticle surface. This is due to the fact that the binding of the protein to the nanoparticle is governed by electrostatic as well as hydrophilic/hydrophobic interactions, which might be altered due to ligand binding. The change in spectra thus provides important information on ligand binding and the type of binding on the protein. Preliminary knowledge of the structure of the protein significantly aids in the understanding of the protein interactions at very low concentrations and with high sensitivities in its active state. Because it is a surface-related phenomenon, SERS is very effective for studying surface-binding small molecules. On the contrary, the major limitations of SERS include inability to predict the exact binding of the ligands when the binding site lies deep within the catalytic pocket. Even if the binding of the ligand occurs on the surface, it may not be detected by SERS if this site does not coincide with the binding of the protein to the nanoparticle surface. In this case, specific chemical functionalization of the protein surface is warranted to understand such a binding. Unlike other spectroscopic techniques such as fluorescence, the binding affinity of the ligand cannot be quantitatively predicted.

We have seen that nitrendipine, which has replaced the chlorine atoms of felodipine with a nitro group at the meta position, and is a generic drug for hypertension, shows a reduced affinity compared with felodipine. This is due to the relative ease of rotation of the phenyl ring due to the removal of the steric hindrance caused by having two chlorine atoms at *ortho* and *meta* positions. This suggests that the locking of the phenyl rings at 90° of each other provides the ideal space to dock at said pocket. This is clearly reflected in the SERS spectra of the nitrendipine Aurora A composite (part of the thesis of S. Siddhanta) (9). This suggests the possibility of modifying the felodipine or analogous molecule for potential drug applications.

## 2. SI Materials and Methods

**2.1. Purification of Enzymes and Substrates and Kinase Assay.** Aurora A and B enzymes expressed as C-terminal His<sub>6</sub>-tagged proteins were purified using Ni-nitrilotriacetic acid affinity purification from the respective, recombinant baculovirus-infected Sf21 cells (10). The bacterially expressed recombinant histone (*Xenopus*) H3, which exists in inclusion bodies, was purified by the denaturation in 8 M urea followed by renaturation as described elsewhere (11). H3 was dialyzed against the buffer containing 10 mM Tris-HCl (pH 7.5), 100 mM NaCl, 20% glycerol (vol/vol), 0.05% Nonidet P-40, 0.02% 2-Mercaptoethanol, and 1 mM EDTA; and analyzed using 15% PAGE. Aurora A kinase mutants were created using a site-directed mutagenesis (QuickChange, Agilent) kit in the pET21b-Aurora A-His backbone and expressed in *Escherichia coli*.

**2.2. Kinase Assay.** One microgram of bacterially expressed recombinant histone H3 was incubated along with either Aurora A (40 ng) or B (40 ng) in a 30- $\mu$ L reaction mixture containing 50 mM Tris-HCl, 100 mM NaCl, 0.1 mM EGTA, 10 mM MgCl<sub>2</sub>, 0.2% 2-Mercaptoethanol, and [ $\gamma$ -<sup>32</sup>P] ATP (specific activity 3.5 Ci/mMol). The reaction mixture and varying concentrations of

felodipine were incubated at 30 °C for 5 min followed by the addition of [ $\gamma$ - $^{32}$ P] ATP and an additional incubation of 10 min. The reaction mixture was precipitated using 25% (wt/vol) trichloroacetic acid and resolved using 15% PAGE followed by autoradiography. The intensity of the signal was quantified using a PhosphorImager analyzer (Fuji) and the same data were plotted as a bar chart. IC<sub>50</sub> was calculated based on the Aurora A autophosphorylation without the substrate histone H3 in a similar assay. For kinetic analysis, increasing concentrations of [ $\gamma$ - $^{32}$ P] ATP (0–120  $\mu$ M) were used in the presence of either DMSO or 10, 20, and 40  $\mu$ M inhibitor in the reaction mixture, which contained a constant amount of enzyme and the other substrate histone H3. The reaction was allowed to proceed for 30 min and subjected to autoradiography. Kinetics was analyzed using the Michaelis–Menten plot to determine the inhibition pattern.

**2.3. Isothermal Calorimetry.** Freshly purified Aurora A was dialyzed extensively against 20 mM Tris-HCl, pH 8.0, 0.2 mM EDTA, and 100 mM KCl before isothermal titration calorimetry (ITC); 4.2  $\mu$ M protein in the cell was titrated against 100  $\mu$ M felodipine in a Microcal ITC 200 microcalorimeter at 25 °C with a stirring speed of 300 rpm. Aurora A and felodipine solutions for ITC were diluted in the final dialysate to prevent artifacts from minor differences in buffer composition. The concentration of DMSO was kept the same in the cell and the syringe (0.2%) to rule out any interference that might arise due to a mismatch of the concentration of DMSO. The samples were thoroughly degassed before titration. The dilution of 100  $\mu$ M felodipine in dialysate containing an equal percentage of DMSO served as the control. The resulting thermogram (background enthalpy subtracted) was analyzed using the one-set-of-binding-sites model of Levenberg–Marquardt nonlinear least-squares curve-fitting algorithm, in-built in the MicroCal LLC software.

**2.4. Cell Culture, Treatment, Immunoblotting Analysis, and FACS Analysis.** All mammalian cells were grown and maintained at 37 °C in a 5% CO<sub>2</sub> incubator using DMEM (Sigma) with 10% FBS (HyClone). For the treatment,  $1 \times 10^5$  cells were seeded in 30-mm dishes. Twenty-four hours after seeding, either DMSO or an increasing concentration of the compound was added and further incubated for 36 h for FACS analysis. For the Western blot analysis, the treatment was given for three hours in the presence of proteasomal block MG132 after arresting the cells in M phase using 200 ng/mL nocodazole for Western blotting, using the anti-phospho-Thr-288 Aurora A and anti-phospho-TACC3 antibody. For H3 S10, Western blot cells were treated for 24 h at indicated concentrations and probed using anti-H3 S10 phospho antibody. For cell cycle analysis, the cells were trypsinized using 0.25% trypsin (Sigma) to collect the cells, washed with PBS, and fixed overnight in 70% (vol/vol) ethanol at –20 °C. They were subsequently stained with (6  $\mu$ M/mL) propidium iodide (Sigma) and RNase treatment was simultaneously given using (10  $\mu$ g/mL) RNase A (Sigma) and analyzed in BD FACSCalibur (BD Biosciences) using Cell Quest software (BD Biosciences).

**2.5. 3-(4,5-Dimethylthiazol-2-yl)-5-(3-Carboxymethoxyphenyl)-2-(4-Sulfophenyl)-2H-Tetrazolium (MTS) Assay and Immunofluorescence. MTS assay.** Cells ( $1 \times 10^3$ ) were seeded in 96-well plates and incubated in DMEM containing 5% (wt/vol) FBS with 5% CO<sub>2</sub> at 37 °C in an incubator. After 24 h the cells were treated with DMSO/felodipine and maintained for 24 h. Subsequently, 20  $\mu$ L CellTiter 96 Aqueous One reagent (Promega) was added to each well and processed per the manufacturer's instructions. Considering the untreated wells as 100% viable, a graph was plotted using the absorbance values obtained from treated wells in terms of percent viability.

**Immunofluorescence.** Coverslip cultures of HeLa cells were treated with DMSO or 10  $\mu$ M felodipine for 24 h. After treatment, the cells were fixed in 4% (wt/vol) paraformaldehyde and permeabilized with 0.1% Triton X-100. After blocking with 5% FBS, the cells were incubated with anti- $\alpha$ -tubulin monoclonal antibody (DM1A; Calbiochem) for 1 h. These cells were further incubated with Alexa Fluor (488 nm)-conjugated anti-mouse antibody (Invitrogen) for 1 h and stained with Hoechst (Sigma) for 20 min and mounted on slides. Confocal microscopic images were captured (Zeiss LSM Meta 510) and manually scored for spindle pole defects. The numbers of cells showing spindle defects were counted across different fields, for which a histogram of percent abnormal mitotic cells over the total number of mitotic cells was plotted. The statistically significant difference between the control and the treated cell populations was obtained using *P* values calculated from a *t* test performed over four independent biological replicates and a sample size of 50 mitotic cells treated with either DMSO or felodipine-treated cells.

**2.6. Animal Experiment.** Six-week-old NIH strain nude mice were procured from the National Institute of Virology and injected with 10<sup>6</sup> Rat C6 glioma cells. The final concentration was adjusted to 10<sup>6</sup> cells per 200  $\mu$ L. An equal volume of ECM gel from Engelbreth-Holm-Swarm mouse sarcoma was added and injected into the left flank of mouse s.c. tissue. After 1 wk, DMSO was administered to three mice and felodipine administered to three other mice (5 mg/kg body weight) daily for a 4-wk period. The tumor volume was measured at weekly intervals and plotted as the rate of tumor progression in percentage versus the number of days posttreatment in weeks. All experiments were performed per committee for the purpose of control and supervision of experiments on animals guidelines.

**2.7. Raman and SERS.** Silver solution was prepared using the method of Lee and Meisel (12). SERS spectra were recorded in a custom-built Raman system (13) using 180° backscattering geometry and a 632.8-nm He–Ne laser (Research Electro Optics, Inc.) as the Raman excitation source. A 60 $\times$  infinity-corrected objective (Nikon Plan Apo; N.A. 0.9) with 5-mW laser power at the sample was used. The samples were prepared by concentrating the silver nanoparticles and maintaining the concentrated nanoparticle solution to an analyte ratio of 4:1 (vol/vol). These spectra were obtained with 40 ng/ $\mu$ L Aurora A/B with or without 1  $\mu$ M felodipine/reversine. The typical accumulation time was 30s.

**2.8. MD Simulations.** The human Aurora A crystallographic structure [Protein Data Bank (PDB) ID code 1MQ4] (14) was used for the initial coordinates of the MD simulations. The electronic structure-optimized (B3LYP/6–31G\*) ligand and the protein form the model complex in our simulation, whereas the respective interactions were duly approximated by CHARMM22 force-field parameters (15), including cross-term energy correction map correction (16). Before performing MD of ligand-bonded protein, the ligand-free crystallographic protein structure was neutralized with counterions and solvated with 32016 TIP3P (17) water molecules. Particle Mesh Ewald was used to calculate long-range electrostatic interactions (18). The SHAKE method was applied for fixing the bond lengths involving a hydrogen atom (19). A box cutoff length of 20 Å was adapted during the simulation. After 500,000 steps of energy-minimization, a 1-ns equilibration MD run was performed with a 1 fs unit step size at 300 K. Subsequently the obtained structure was used for molecular docking studies.

The optimized structure of ligand was docked into the protein using the Autodock (Version 4.2) (20). AutoDockTools 1.5.4 (21) was used to set the rotatable bonds and add polar hydrogen. Gasteiger charge was added and the protein was embedded in a grid box with dimensions 126  $\times$  126  $\times$  126, which was centered



on the mass center of the protein with a grid spacing of 0.375 Å. The Lamarckian genetic algorithm (22) was used to generate the ligand–protein conformation. Docking was performed with a population size of 300 with  $25 \times 10^5$  evaluations and a maximum of 27,000 generations. Cluster analysis was performed with an rmsd tolerance of 2 Å. The best conformation is considered to be the conformation with the lowest free binding energy or the lowest energy conformation of the most populated cluster. Finer docking was achieved by maintaining the center of the smaller grid box with dimensions  $60 \times 60 \times 60$  at the ligand position of the lowest binding energy.

The resulting coordinates of the docked complex were secured for additional MD runs. The entire complex was energy-minimized, followed by a 2-ns MD run at 300 K to capture the required dynamics for our simulation studies. All essential MD procedures were performed with the NAMD program suite (Version 2.8) (23). Corresponding topology and parameter files for MD were generated with the paratool plugin in the VMD visualization

program (24), whereas the missing hydrogens of the crystal structure were incorporated using the psfgen plugin. The ab initio electronic structure of the ligand was obtained using Gaussian 09 (25).

**2.9. IHC and Histopathological Analysis.** Tissues collected in 5% (vol/vol) buffered formalin solution were dehydrated, paraffin embedded, and sectioned using Leica microtome. Five-micron sections of tissue were fixed on glass slides at 55 °C and deparaffinized. Subsequently IHC analysis was performed with an LSAB+System+HRP kit (Dako) exactly per the manufacturer's protocol using the indicated antibodies. The staining pattern was visualized and manually quantitated. A statistical analysis was performed with three independent tumor sections at 40× magnification and the ratio of the total number of 3,3'-diaminobenzidine (+) nuclei versus total number of nuclei was calculated and expressed as the percent nuclear positive.

1. Manfredi MG, et al. (2011) Characterization of Alisertib (MLN8237), an investigational small-molecule inhibitor of aurora A kinase using novel in vivo pharmacodynamic assays. *Clinical Cancer Research* 17(24):7614–7624.
2. Ohashi S, et al. (2006) Phospho-regulation of human protein kinase Aurora-A: Analysis using anti-phospho-Thr288 monoclonal antibodies. *Oncogene* 25(59):7691–7702.
3. Morris GM, et al. (2009) AutoDock4 and AutoDockTools4: Automated docking with selective receptor flexibility. *J Comput Chem* 30(16):2785–2791.
4. McCall SL, Platzman PM, Wolff PA (1980) Surface enhanced Raman scattering. *Phys Lett A* 77(5):381–383.
5. Nie S, Emory SR (1997) Probing single molecules and single nanoparticles by surface-enhanced Raman scattering. *Science* 275(5303):1102–1106.
6. Barth A, Zscherp C (2002) What vibrations tell us about proteins. *Q Rev Biophys* 35(4):369–430.
7. Schatz G, Young M, Duynes R (2006) Electromagnetic mechanism of SERS. *Surface-Enhanced Raman Scattering*, Topics in Applied Physics, eds Kneipp K, Moskovits M, Kneipp H (Springer, Berlin), Vol 103, pp 19–45.
8. Suh JS, Moskovits M (1986) Surface-enhanced Raman spectroscopy of amino acids and nucleotide bases adsorbed on silver. *J Am Chem Soc* 108(16):4711–4718.
9. Siddhanta S (2014) Application of Raman and surface enhanced Raman spectroscopy in probing biomolecular interactions. PhD thesis (Jawaharlal Nehru Centre for Advanced Scientific Research, Bangalore, India).
10. Kishore AH, et al. (2008) Specific small-molecule activator of Aurora kinase A induces autophosphorylation in a cell-free system. *J Med Chem* 51(4):792–797.
11. Luger K, Mäder AW, Richmond RK, Sargent DF, Richmond TJ (1997) Crystal structure of the nucleosome core particle at 2.8 Å resolution. *Nature* 389(6648):251–260.
12. Lee PC, Meisel D (1982) Adsorption and surface-enhanced Raman of dyes on silver and gold sols. *J Phys Chem* 86(17):3391–3395.
13. Kumar GVP, Narayana C (2007) Adapting a fluorescence microscope to perform surface enhanced Raman spectroscopy. *Curr Sci* 93:778–781.
14. Nowakowski J, et al. (2002) Structures of the cancer-related Aurora-A, FAK, and EphA2 protein kinases from nanovolume crystallography. *Structure* 10(12):1659–1667.
15. MacKerell AD, et al. (1998) All-atom empirical potential for molecular modeling and dynamics studies of proteins. *J Phys Chem B* 102(18):3586–3616.
16. Mackerell AD, Jr., Feig M, Brooks CL, 3rd (2004) Extending the treatment of backbone energetics in protein force fields: Limitations of gas-phase quantum mechanics in reproducing protein conformational distributions in molecular dynamics simulations. *J Comput Chem* 25(11):1400–1415.
17. Jorgensen WL, Chandrasekhar J, Madura JD, Impey RW, Klein ML (1983) Comparison of simple potential functions for simulating liquid water. *J Chem Phys* 79(2):926–935.
18. Darden T, York D, Pedersen L (1993) Particle mesh Ewald: An N-log(N) method for Ewald sums in large systems. *J Chem Phys* 98(12):10089–10092.
19. Ryckaert J-P, Ciccotti G, Berendsen HJC (1977) Numerical integration of the cartesian equations of motion of a system with constraints: Molecular dynamics of n-alkanes. *J Comput Phys* 23(3):327–341.
20. Morris GM, et al. (2009) AutoDock4 and AutoDockTools4: Automated docking with selective receptor flexibility. *J Comput Chem* 30(16):2785–2791.
21. Sanner MF (1999) Python: A programming language for software integration and development. *J Mol Graph Model* 17(1):57–61.
22. Morris GM, et al. (1998) Automated docking using a Lamarckian genetic algorithm and an empirical binding free energy function. *J Comput Chem* 19(14):1639–1662.
23. Phillips JC, et al. (2005) Scalable molecular dynamics with NAMD. *J Comput Chem* 26(16):1781–1802.
24. Humphrey W, Dalke A, Schulten K (1996) VMD: Visual molecular dynamics. *J Mol Graph* 14(1):33–38, 27–28.
25. Frisch MJ, et al. (2009) *Gaussian 09, revision B.01* (Gaussian, Inc., Wallingford, CT).



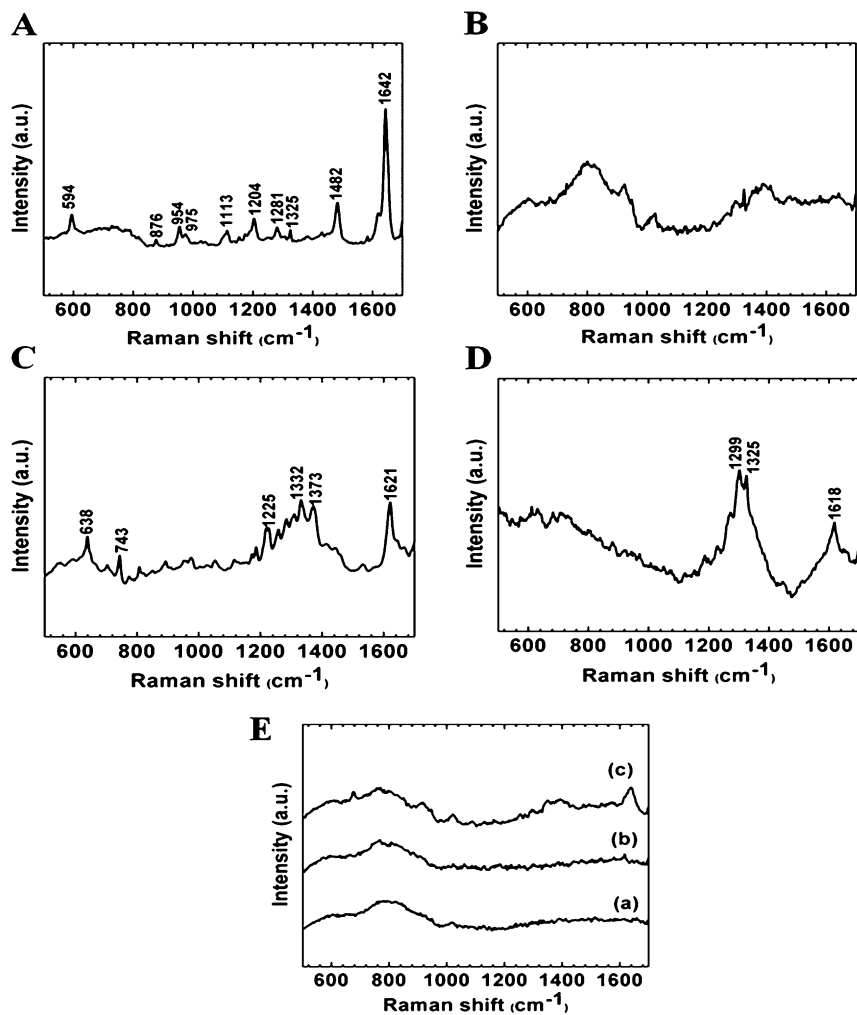

**Fig. S2.** (A) Raman spectra of felodipine and (B) SERS spectra of felodipine. (C) Raman spectra of reversine. (D) SERS spectra of reversine and (E) SERS spectra of the silver nanoparticle in aqueous solution (a), protein buffer (b), and protein buffer containing DMSO (c).



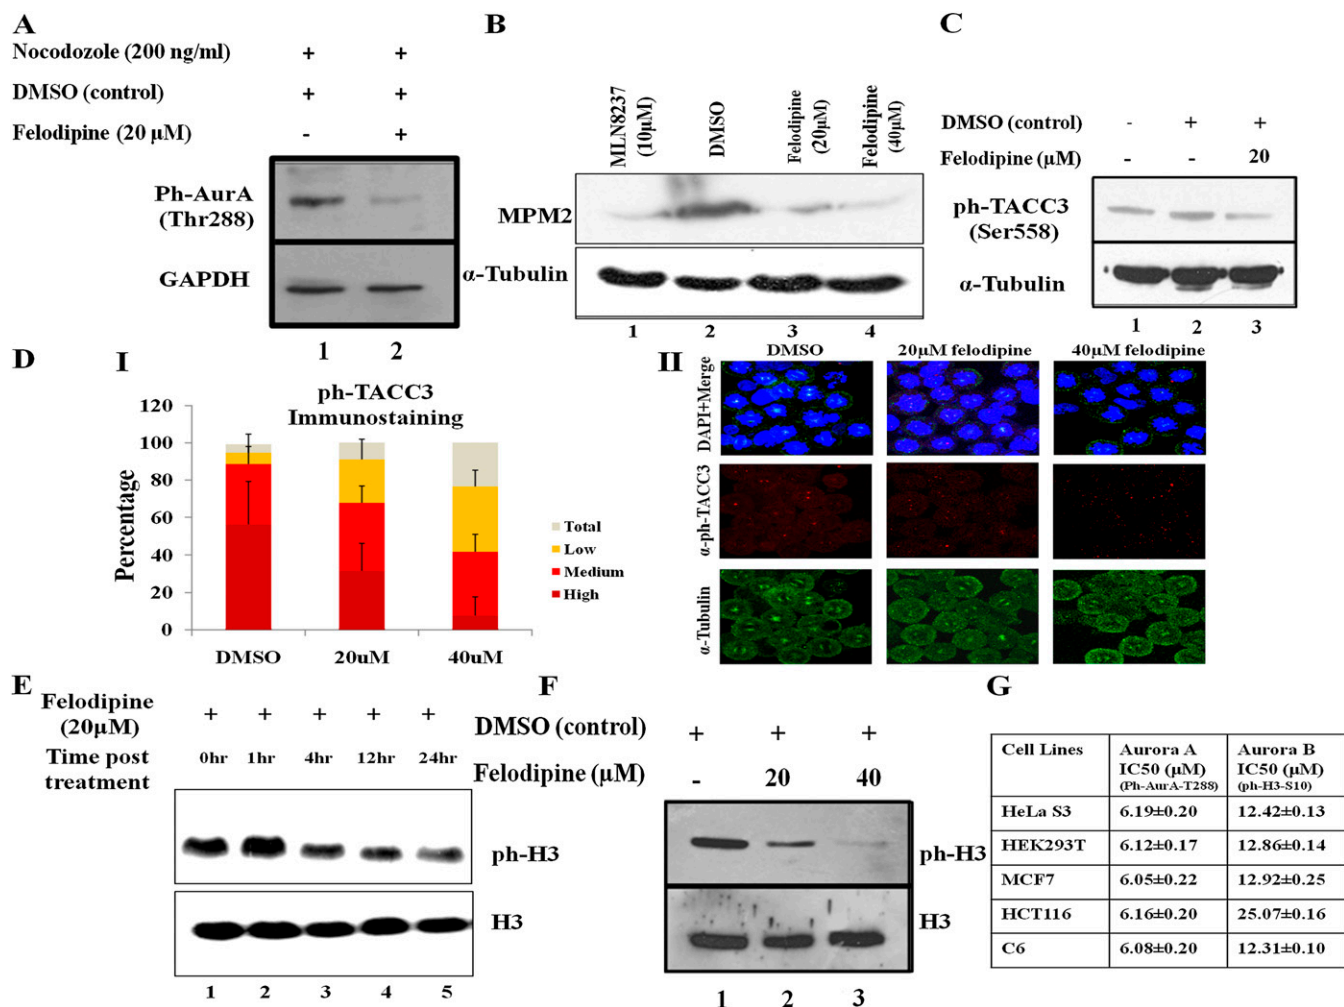

**Fig. S4.** (A) Lysates from HeLa cells preexposed to nocodazole and treated with the indicated concentration of felodipine and DMSO with 20  $\mu$ M MG132 for 3 h in the presence of nocodazole were subjected to the Western blot analysis using the indicated antibody and GAPDH as the loading control. (B) Western blot analysis of HeLa cells lysates prepared after 24 h of treatment with the indicated compounds using MPM2 antibody and  $\alpha$ -tubulin (loading control). (C) Felodipine shows inhibition of TACC3 phosphorylation. Western blot analysis was performed with untreated, DMSO, and felodipine-treated whole-cell extracts using phospho-TACC3 antibody and  $\alpha$ -tubulin antibody (loading control). (D) In a parallel assay, immunofluorescence staining of the cells treated with the indicated compounds was performed using ph-TACC3 antibody and  $\alpha$ -tubulin to capture the dividing cells. Based on the staining intensity of the images, scoring was done with a low cutoff intensity of 0–50, a medium cutoff intensity of 50–150, and a high cutoff intensity of 150 to 200, and tabulated as bar chart in D, I. Error bars represent SDs. The representative images, under 63 $\times$  magnification, are shown in D, II. E shows the Western blot analysis of cell lysates prepared from cells posttreatment with the indicated time using ph-H3 and H3 (loading control) antibodies. (F) Similarly, lysates from HeLa cells treated with either DMSO only (lane 1) or the indicated concentration of felodipine for 24 h were subjected to the Western blot analysis using ph-H3 antibody and H3 antibody (loading control). (G) Intracellular IC<sub>50</sub> traced by the indicated antibodies for Aurora A and B kinases by immunofluorescence and Western blot analysis, respectively, are tabulated.



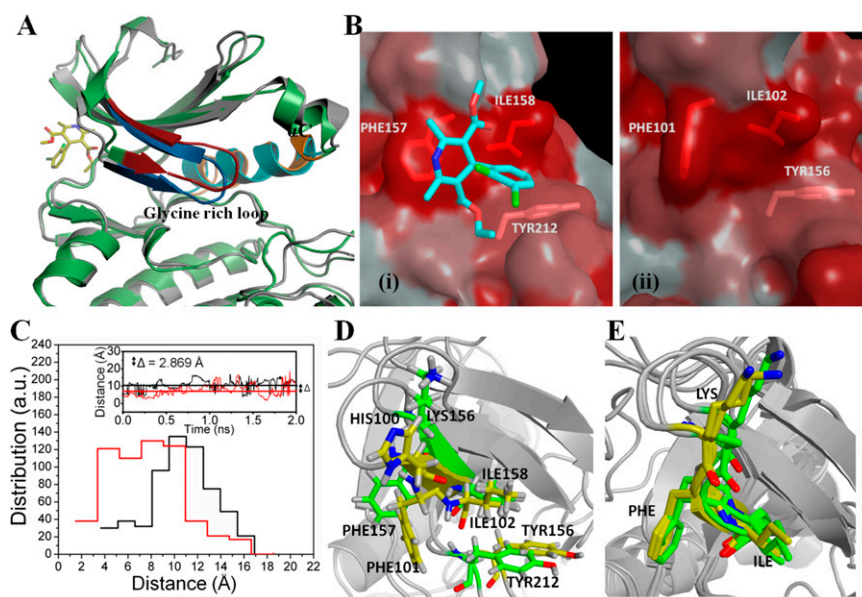

**Fig. S5.** (A) Superimposed structures of Aurora A after 2 ns of MD simulation with (gray) and without (green) felodipine. The glycine-rich loop region undergoes change in conformation (colored in red and blue to denote free and felodipine-bound, respectively). The  $\alpha$ C region is colored in orange (free) and cyan (felodipine-bound). (B) Binding region of felodipine to Aurora A (i) and the corresponding site in Aurora B (ii) represented by Eisenberg's hydrophobicity index. The felodipine bound to Aurora A is shown in stick representation. (C) rmsd distances between center of masses of residues Phe-157 and Ile-158 (Aurora A is black) and Phe-101 and Ile-102 (Aurora B is red) obtained in 400 frames of a 2-ns MD simulation plotted as a histogram. *Inset* shows the variation in the rmsd distance between center of masses of Phe-157 and Ile-158 (Aurora A, in black) and Phe-101 and Ile-102 (Aurora B, in red) as a function of time. The mean averages of these distances are shown as solid lines. The difference in mean average was 2.869 Å. (D) Superimposed felodipine-binding pocket of 1-ns equilibrated structures of human Aurora A and the corresponding pocket in human Aurora B. Key residues are shown in sticks. (E) Superimposed crystal structures of human Aurora A (PDB ID codes 1MQ4 and 2WTV) and *Xenopus* Aurora B (PDB ID codes 2VGO and 2BFX). The carbon atoms in Aurora A and B are colored in green and yellow, respectively. Nitrogen, oxygen, and hydrogen atoms are colored in blue, red and white, respectively in D and E.
